# Supplementary material for: Effect of Packaging and Coating Technique on Postharvest Quality and Shelf Life of Raphanus sativus L. and Hibiscus sabdariffa L. Microgreens
Source: PubMed Central journal article supplement (PMC7278862; doi:10.3390/foods9050653), 2020-05-19
Supplement: foods-09-00653-s001.pdf [file foods-09-00653-s001.pdf]

## Supplementary materials

**Table S1.** Effect of packaging on the marketability of radish and roselle microgreens during storage at 5 °C.

| Packaging                  | Storage period (Days) | % wilting | % leaf discoloration | % loss of OA | % loss of saleability | MS |
|----------------------------|-----------------------|-----------|----------------------|--------------|-----------------------|----|
| <i>Radish microgreens</i>  |                       |           |                      |              |                       |    |
| PET- CS                    | 0                     | 0.00      | 0.00                 | 7.8          | 1.6                   | 5  |
|                            | 4                     | 14.2      | 11.0                 | 13.3         | 12.7                  | 4  |
|                            | 8                     | 35.2      | 15.1                 | 22.2         | 24.6                  | 3  |
| LDPE - SSB                 | 0                     | 0.00      | 0.00                 | 7.8          | 1.6                   | 5  |
|                            | 4                     | 18.8      | 12.0                 | 16.7         | 15.7                  | 4  |
|                            | 8                     | 37.4      | 17.3                 | 25.6         | 27.0                  | 3  |
| <i>Roselle microgreens</i> |                       |           |                      |              |                       |    |
| PET- CS                    | 0                     | 0.00      | 0.00                 | 6.7          | 1.3                   | 5  |
|                            | 4                     | 17.6      | 13.9                 | 15.6         | 15.7                  | 4  |
|                            | 8                     | 37.4      | 17.6                 | 26.7         | 27.3                  | 3  |
| LDPE - SSB                 | 0                     | 0.00      | 0.00                 | 6.7          | 1.3                   | 5  |
|                            | 4                     | 19.9      | 16.0                 | 17.8         | 17.9                  | 4  |
|                            | 8                     | 38.7      | 22.5                 | 31.1         | 30.7                  | 2  |

PET- CS: PET clamshell containers; LDPE – SSB: LDPE self-seal bags; OA: Overall acceptability; MS: Marketability score.

**Figure S1.** Digital photographs showing effect of packaging on radish (RaS) and roselle (HbS) microgreens on 0 day and 8<sup>th</sup> day of storage

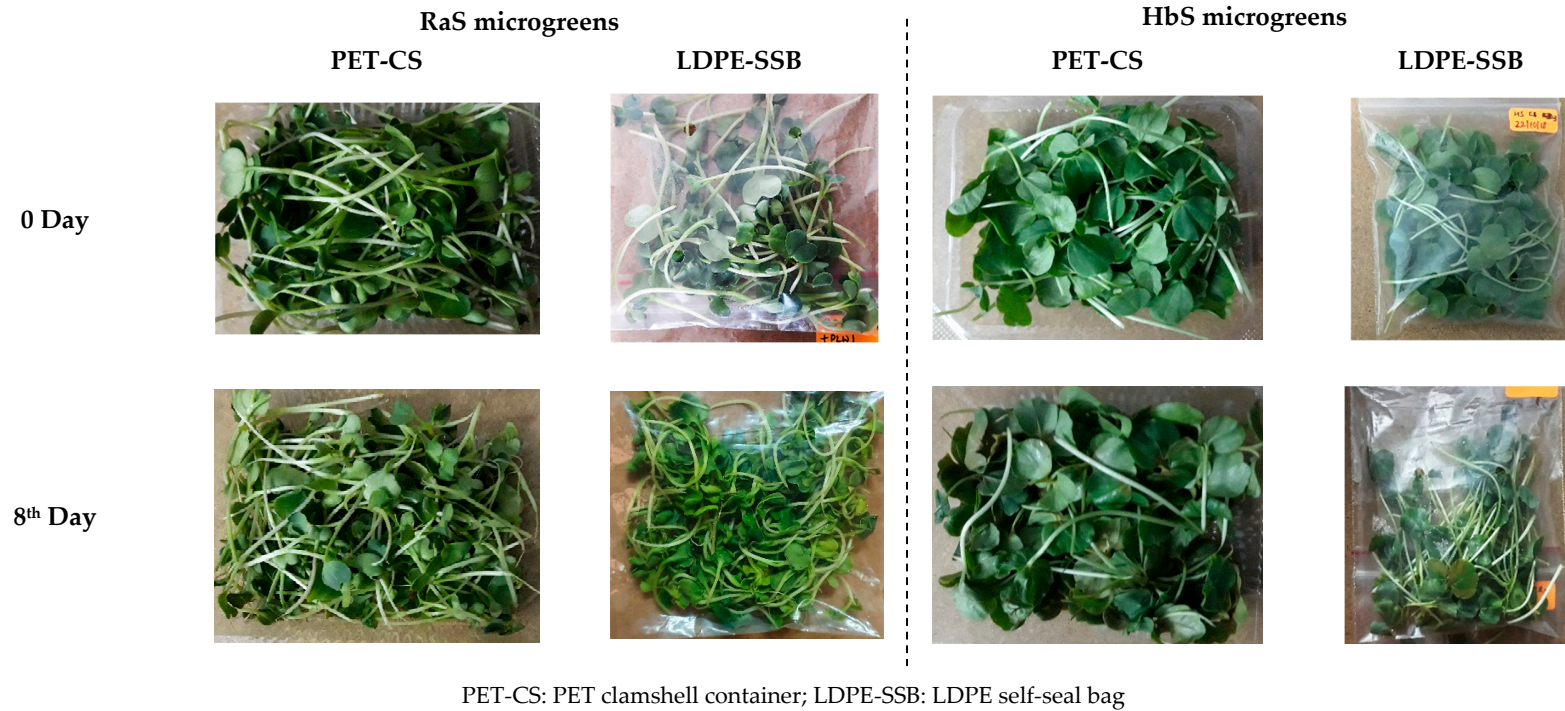

**Table S3.** Effect of edible coating treatment on the marketability of radish and roselle microgreens during storage at 5 °C.

| Packaging                  | Storage period (Days) | % wilting | % leaf discoloration | % loss of OA | % loss of saleability | MS |
|----------------------------|-----------------------|-----------|----------------------|--------------|-----------------------|----|
| <i>Radish microgreens</i>  |                       |           |                      |              |                       |    |
| C                          | 0                     | 0.0       | 0.0                  | 7.8          | 1.6                   | 5  |
|                            | 4                     | 14.2      | 11.0                 | 13.3         | 12.7                  | 4  |
|                            | 8                     | 35.2      | 15.1                 | 22.2         | 24.6                  | 3  |
|                            | 12                    | 48.4      | 33.1                 | 28.9         | 38.6                  | 2  |
| AGSC                       | 0                     | 0.0       | 0.0                  | 6.7          | 1.3                   | 5  |
|                            | 4                     | 4.8       | 0.0                  | 10.6         | 4.0                   | 5  |
|                            | 8                     | 12.8      | 2.3                  | 12.2         | 8.5                   | 5  |
|                            | 12                    | 23.4      | 7.7                  | 16.7         | 15.8                  | 4  |
| AGDC                       | 0                     | 0.0       | 0.0                  | 7.1          | 1.4                   | 5  |
|                            | 4                     | 5.5       | 1.4                  | 11.8         | 5.1                   | 5  |
|                            | 8                     | 16.4      | 5.1                  | 16.4         | 11.9                  | 4  |
|                            | 12                    | 25.6      | 11.6                 | 19.1         | 18.7                  | 4  |
| <i>Roselle microgreens</i> |                       |           |                      |              |                       |    |
| C                          | 0                     | 0.0       | 0.0                  | 6.7          | 1.3                   | 5  |
|                            | 4                     | 17.6      | 13.9                 | 15.6         | 15.7                  | 4  |
|                            | 8                     | 37.4      | 17.6                 | 26.7         | 27.3                  | 3  |
|                            | 12                    | 55.1      | 46.8                 | 35.6         | 47.9                  | 1  |
| AGSC                       | 0                     | 0.0       | 0.0                  | 5.6          | 1.1                   | 5  |
|                            | 4                     | 4.4       | 1.8                  | 10.0         | 4.5                   | 5  |
|                            | 8                     | 10.2      | 7.8                  | 12.8         | 9.8                   | 5  |
|                            | 12                    | 15.2      | 16.1                 | 17.8         | 16.1                  | 4  |
| AGDC                       | 0                     | 0.0       | 0.0                  | 5.6          | 1.1                   | 5  |
|                            | 4                     | 5.1       | 3.1                  | 11.1         | 5.5                   | 5  |
|                            | 8                     | 12.7      | 15.8                 | 18.9         | 15.2                  | 4  |
|                            | 12                    | 24.0      | 30.5                 | 25.6         | 26.9                  | 3  |

C – Uncoated control; AGSC – Aloe gel spray coating; AGDP – Aloe gel dip coating; OA – Overall acceptability; MS – marketability score.

**Figure S2.** Digital photographs showing effect of edible coating techniques on radish (RaS) and roselle (HbS) microgreens on 0 day and 12<sup>th</sup> day of storage.

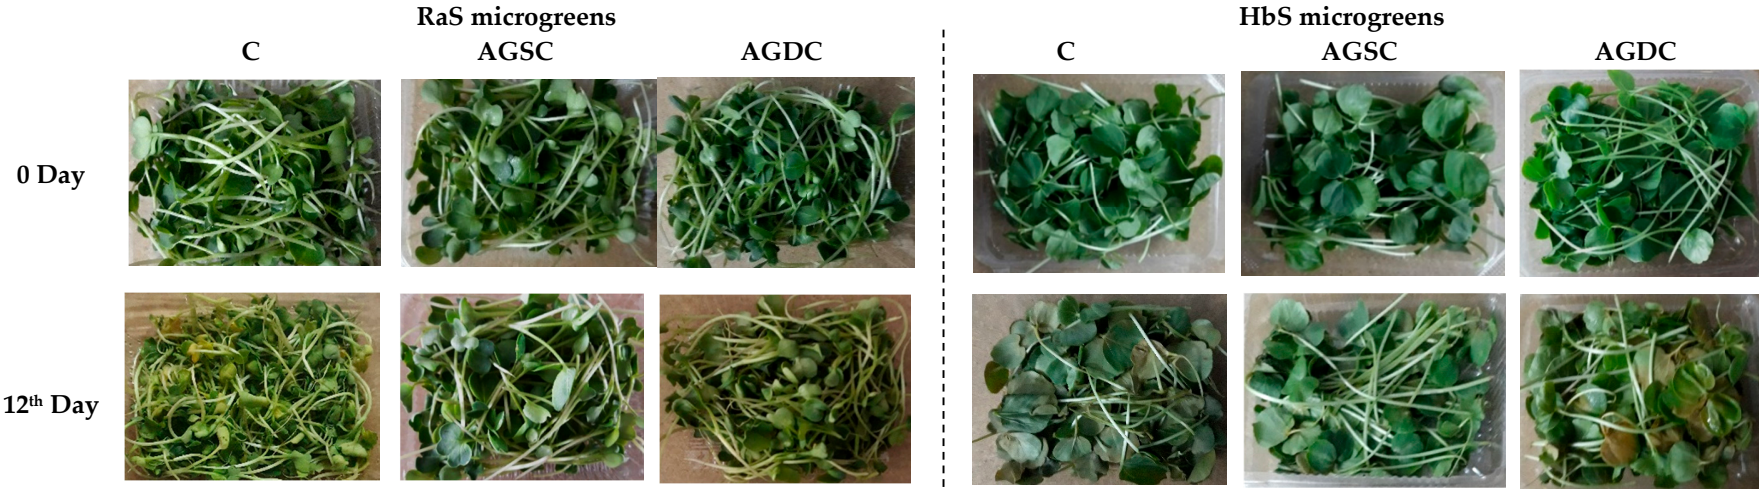

C: uncoated; AGSC: Aloe gel spray coating; AGDC: Aloe gel dip coating.
